# Supplementary material for: Multi-component post-polymerization modification reactions of polymers featuring lignin-model compounds
Source: Royal Society of Chemistry journal article supplement (doi:10.1039/c7py01923h), 2018-01-01
Supplement: c7py01923h1.pdf [file c7py01923h1.pdf]

# Multi-Component Post-Polymerization Modification Reactions of Polymers Featuring Lignin-Model Compounds

*Ryohei Kakuchi<sup>a\*</sup>, Satoshi Yoshida<sup>b</sup>, Takasuke Sasaki<sup>b</sup>, Shigeyoshi Kanoh<sup>b</sup>, Katsuhiro Maeda<sup>b,c\*</sup>*

<sup>a</sup> Division of Molecular Science, Graduate School of Science and Technology, Gunma University, 1-5-1 Tenjin-cho, Kiryu 376-8515, Gunma, Japan.

<sup>b</sup> Graduate School of Natural Science and Technology, Kanazawa University, Kakuma-machi, Kanazawa 920-1192, Japan.

<sup>c</sup> Nano Life Science Institute (WPI-NanoLSI), Kanazawa University, Kakuma-machi, Kanazawa 920-1192, Japan

E-mail: kakuchi@gunma-u.ac.jp and maeda@se.kanazawa-u.ac.jp

SUPPORTING INFORMATION

## ***Experimental Section***

**Synthesis of methacrylated vanillin (MV):** In principle, the title compound was synthesized according to a previously reported method except for the purification process.<sup>1</sup> The obtained crude product was purified by recrystallization (CHCl<sub>3</sub>/hexane), and the obtained white solid was dried under vacuum to produce a methacrylated vanillin (MV). The spectroscopic data of the obtained product gave a good agreement with reported values.<sup>1</sup> Yield: 14.3 g (66.0%).

<sup>1</sup>H NMR (500 MHz, CDCl<sub>3</sub>) δ: 9.95 (s, 1H), 7.54 – 7.41 (m, 2H), 7.29 – 7.20 (m, 1H), 6.40 – 6.37 (m, 1H), 5.81 – 5.78 (m, 1H), 3.89 (s, 3H), 2.09 – 2.05 (m, 3H).

**Synthesis of methacrylated syringaldehyde (MS):** Under N<sub>2</sub> atmosphere, syringaldehyde (20.0 g, 110 mmol, 1.0 eq.), DMAP (322 mg, 2.64 mmol, 2.4 mol %), CH<sub>2</sub>Cl<sub>2</sub> (50 mL), and methacrylic anhydride (20.9 mL, 131.7 mmol, 1.2 eq.) were added to two-necked round-bottom flask and stirred for 3 hours at room temperature, after which the reaction mixture was allowed to be stirred for 48 hours at 45 °C. The resulting reaction product was diluted in CH<sub>2</sub>Cl<sub>2</sub> and washed with 1N HCl aqueous solution, saturated NaHCO<sub>3</sub> aqueous solution, and water. After the solvent was evaporated, the crude product was purified by recrystallization (CHCl<sub>3</sub>/hexane), and the obtained white solid was dried under vacuum to produce a methacrylated syringaldehyde (MS). The spectroscopic data of the obtained product gave a good agreement with reported values.<sup>2</sup> Yield: 15.0 g (54.4%).

<sup>1</sup>H NMR (500 MHz, CDCl<sub>3</sub>) δ: 9.92 (s, 1H), 7.17 (s, 2H), 6.42 – 6.40 (m, 1H), 5.83 – 5.73 (m, 1H), 3.90 (s, 6H), 2.09 (s, 3H).

## ***References***

1. Stanzione, J. F.; Sadler, J. M.; La Scala, J. J.; Wool, R. P., Lignin Model Compounds as Bio-Based Reactive Diluents for Liquid Molding Resins. *ChemSusChem* **2012**, *5* (7), 1291-1297.
2. Zhou, J.; Zhang, H.; Deng, J.; Wu, Y., High Glass-Transition Temperature Acrylate Polymers Derived from Biomasses, Syringaldehyde, and Vanillin. *Macromol. Chem. Phys.* **2016**, *217* (21), 2402-2408.

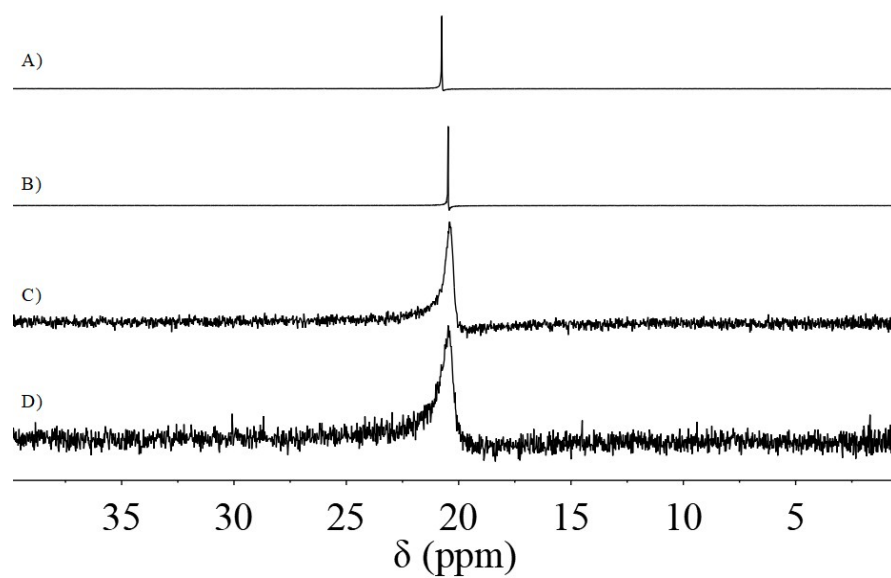

**Fig. S1**  $^{31}\text{P}$  NMR spectra of the model compounds (V-AP (A) and S-AP (B)) and the obtained polymers after Kabachnik-Fields reaction on PMV (C) (PMV-1, Table 1) and PMS (D) (PMS-1, Table 1) with *p*-anisidine and diisopropyl phosphite in  $\text{CDCl}_3$  at 25 °C.

### Waterfall plots for kinetic experiments

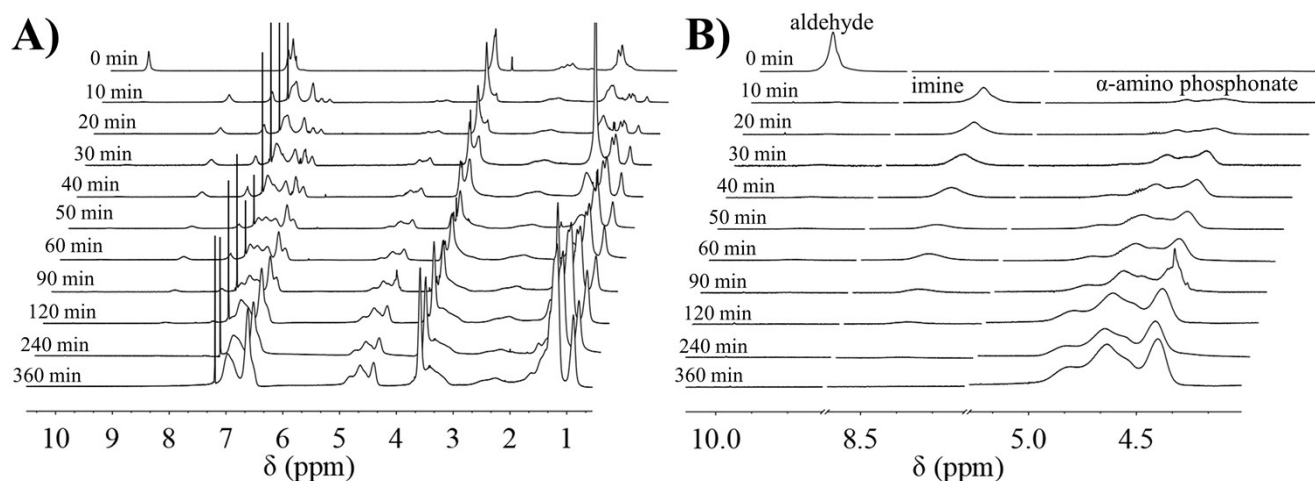

**Fig. S2** Waterfall plots (A; whole regions and B; magnified regions) of the <sup>1</sup>H NMR spectra in CDCl<sub>3</sub> at 55 °C of the kinetic experiments for PMV with *p*-anisidine and diisopropyl phosphite. Reaction conditions are as follows: 1,4-dioxane as a solvent; initial aldehyde concentration was adjusted to 1.1 mol·L<sup>-1</sup>; Ar atmosphere; [CHO]<sub>0</sub>/[amine]<sub>0</sub>/[phosphite]<sub>0</sub> was adjusted to 1/1.1/1.5.

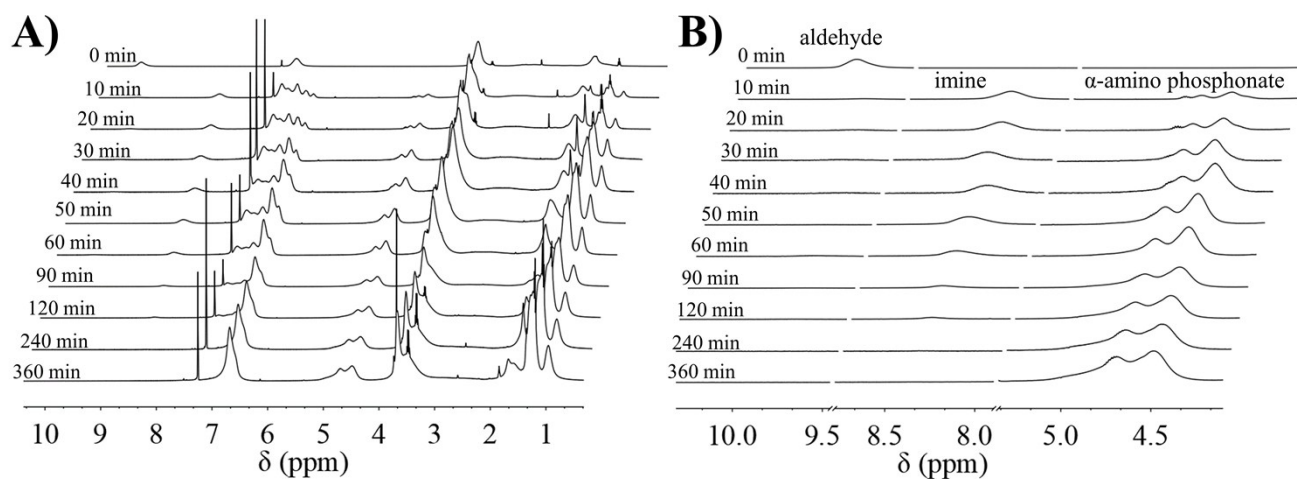

**Fig. S3** Waterfall plots (A; whole regions and B; magnified regions) of the <sup>1</sup>H NMR spectra in CDCl<sub>3</sub> at 55 °C of the kinetic experiments for PMS with *p*-anisidine and diisopropyl phosphite. Reaction conditions are as follows: 1,4-dioxane as a solvent; initial aldehyde concentration was adjusted to 1.1 mol·L<sup>-1</sup>; Ar atmosphere; [CHO]<sub>0</sub>/[amine]<sub>0</sub>/[phosphite]<sub>0</sub> was adjusted to 1/1.1/1.5.

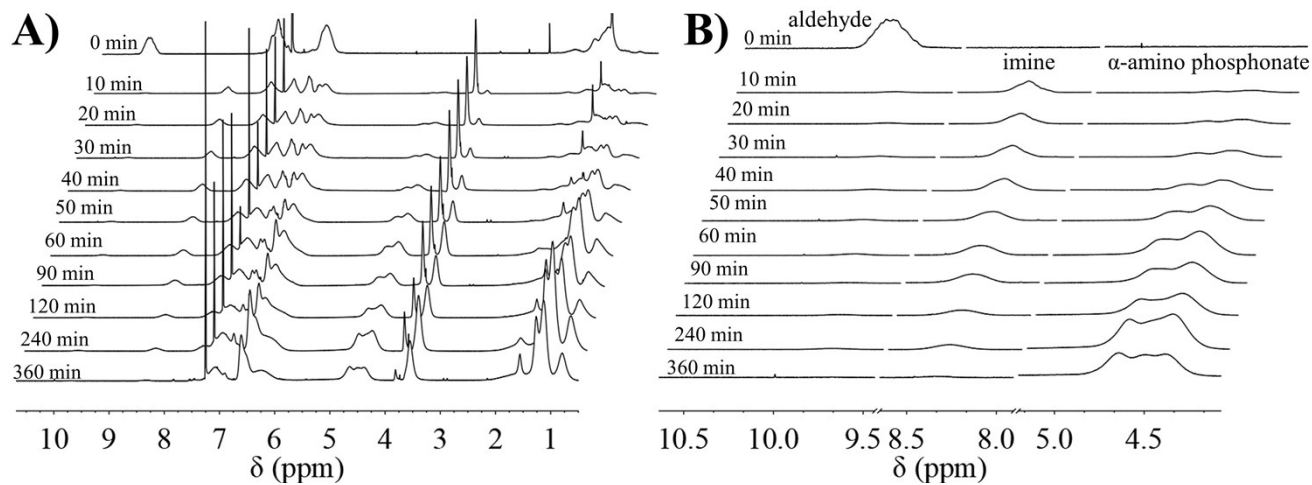

**Fig. S4** Waterfall plots (A; whole regions and B; magnified regions) of the  $^1\text{H}$  NMR spectra in  $\text{CDCl}_3$  at  $55^\circ\text{C}$  of the kinetic experiments for poly(St-CHO) with *p*-anisidine and diisopropyl phosphite. Reaction conditions are as follows: 1,4-dioxane as a solvent; initial aldehyde concentration was adjusted to  $1.1\text{ mol}\cdot\text{L}^{-1}$ ; Ar atmosphere;  $[\text{CHO}]_0/[\text{amine}]_0/[\text{phosphite}]_0$  was adjusted to 1/1.1/1.5.

**Structural Proofs for obtained polymers**

**(<sup>1</sup>H NMR spectra for PMVs)**

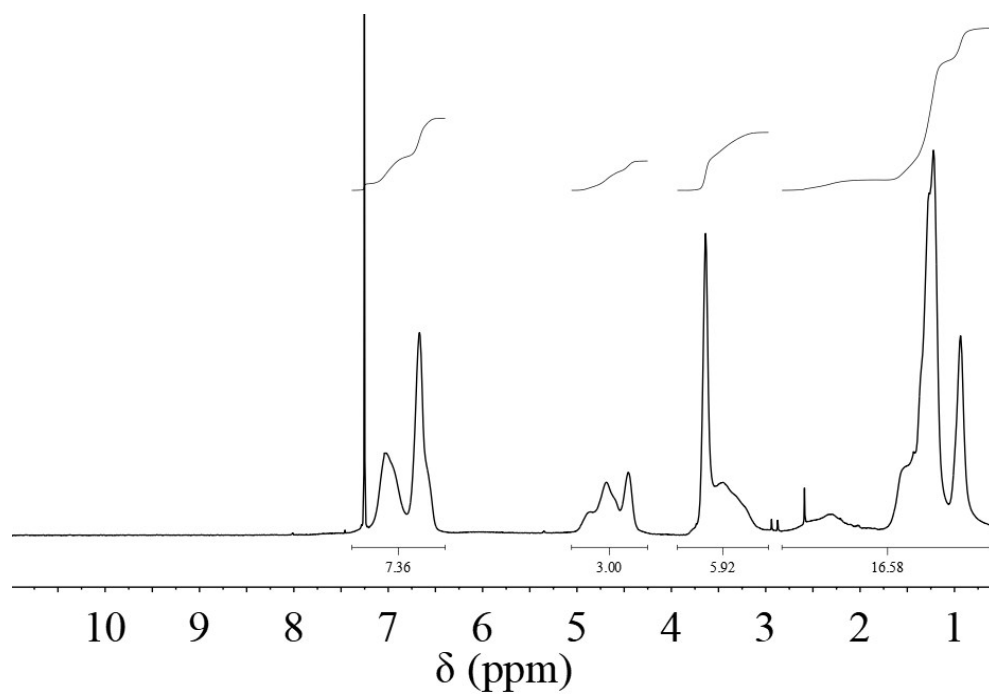

**Fig. S5** <sup>1</sup>H NMR spectrum of the obtained polymer after Kabachnik-Fields reaction on PMV with *p*-anisidine and diisopropyl phosphite (PMV-1, Table 1) in CDCl<sub>3</sub> at 55 °C.

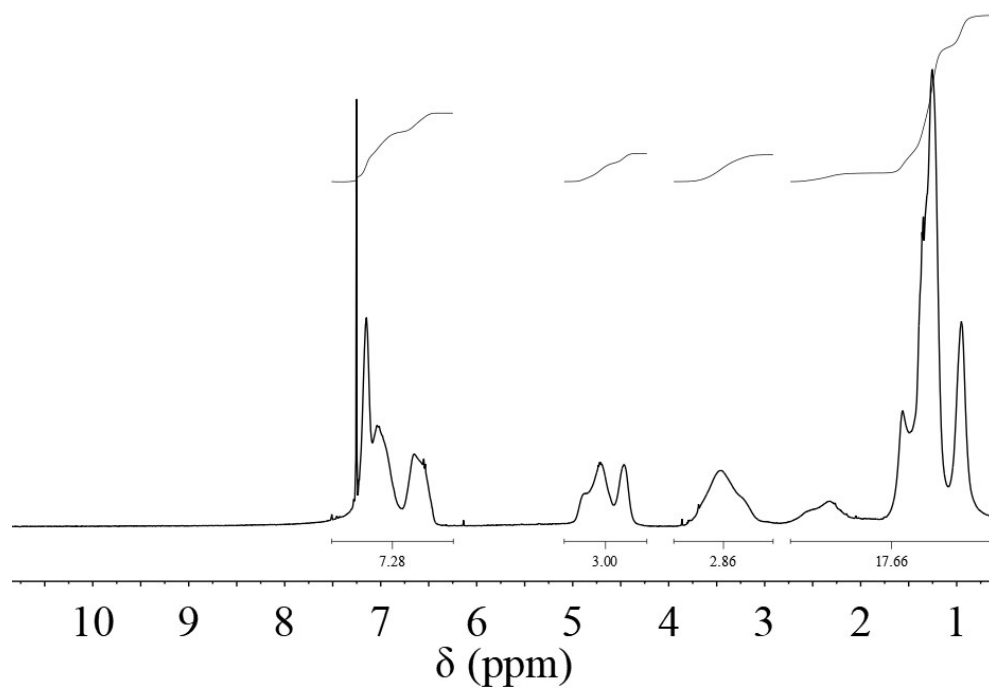

**Fig. S6** <sup>1</sup>H NMR spectrum of the obtained polymer after Kabachnik-Fields reaction on PMV with *p*-bromoaniline and diisopropyl phosphite (PMV-2, Table 1) in CDCl<sub>3</sub> at 55 °C.

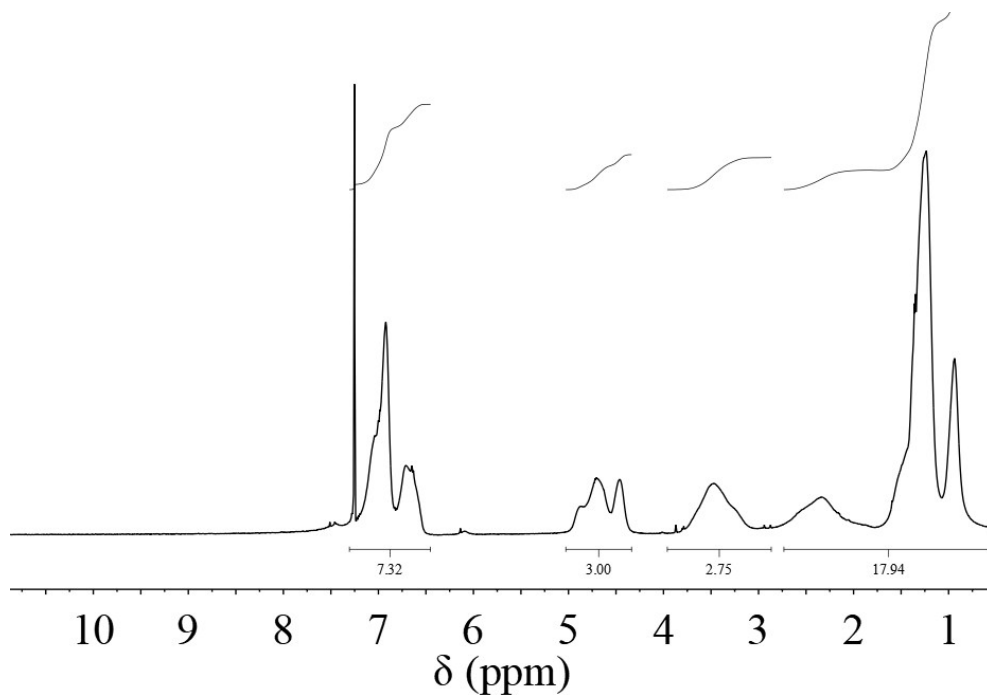

**Fig. S7** <sup>1</sup>H NMR spectrum of the obtained polymer after Kabachnik-Fields reaction on PMV with 4-(trifluoromethoxy)aniline and diisopropyl phosphite (PMV-3, Table 1) in CDCl<sub>3</sub> at 55 °C.

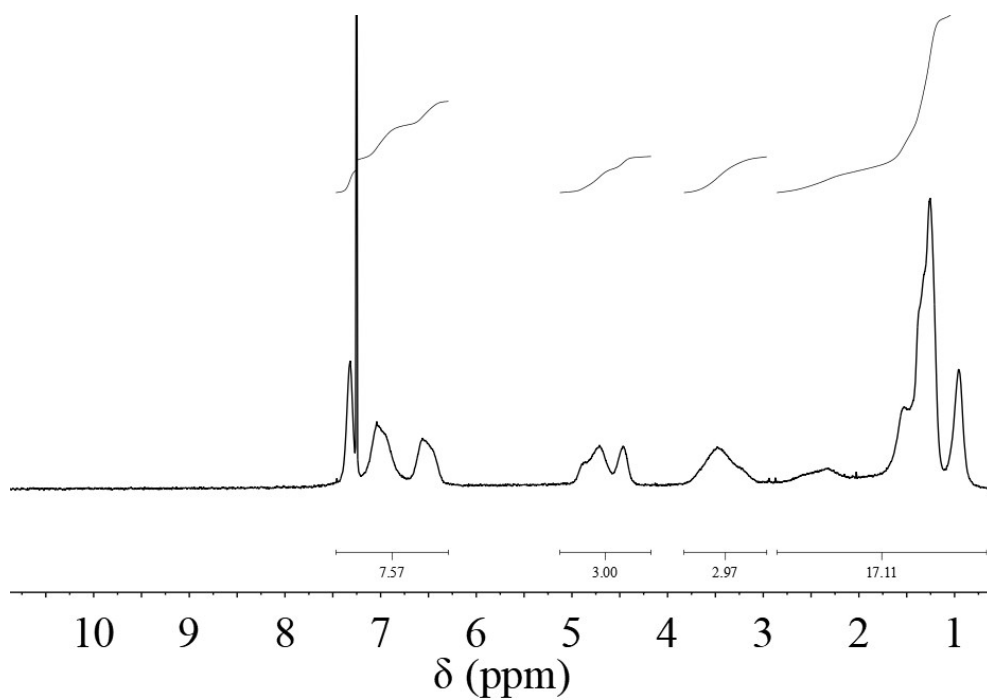

**Fig. S8** <sup>1</sup>H NMR spectrum of the obtained polymer after Kabachnik-Fields reaction on PMV with *p*-Iodoaniline and diisobutyl phosphite (PMV-4, Table 1) in CDCl<sub>3</sub> at 55 °C.

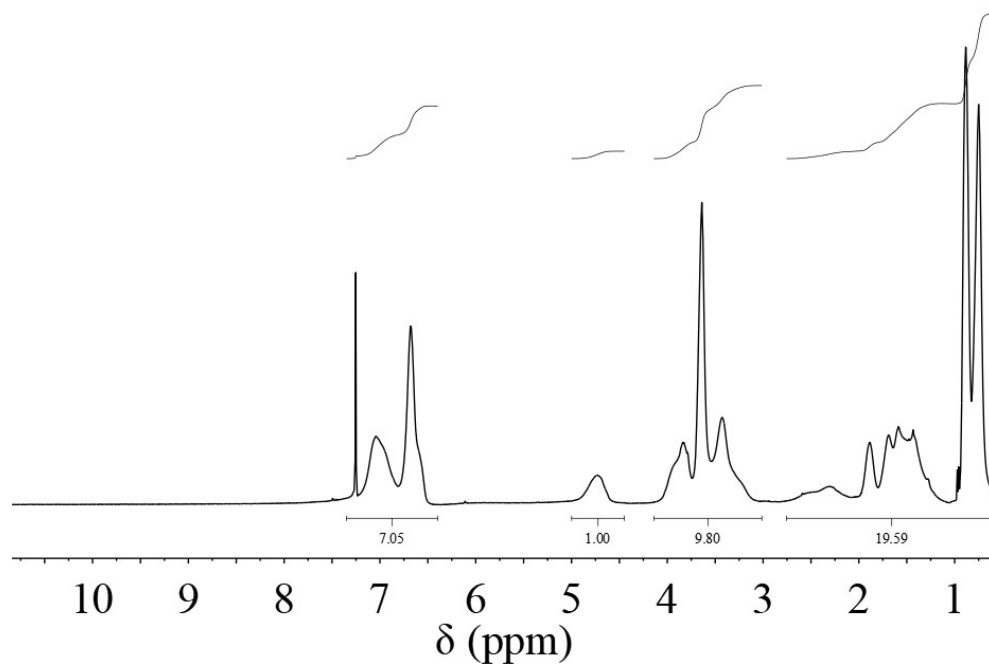

**Fig. S9** <sup>1</sup>H NMR spectrum of the obtained polymer after Kabachnik-Fields reaction on PMV with *p*-anisidine and diisobutyl phosphite (PMV-5, Table 1) in CDCl<sub>3</sub> at 55 °C.

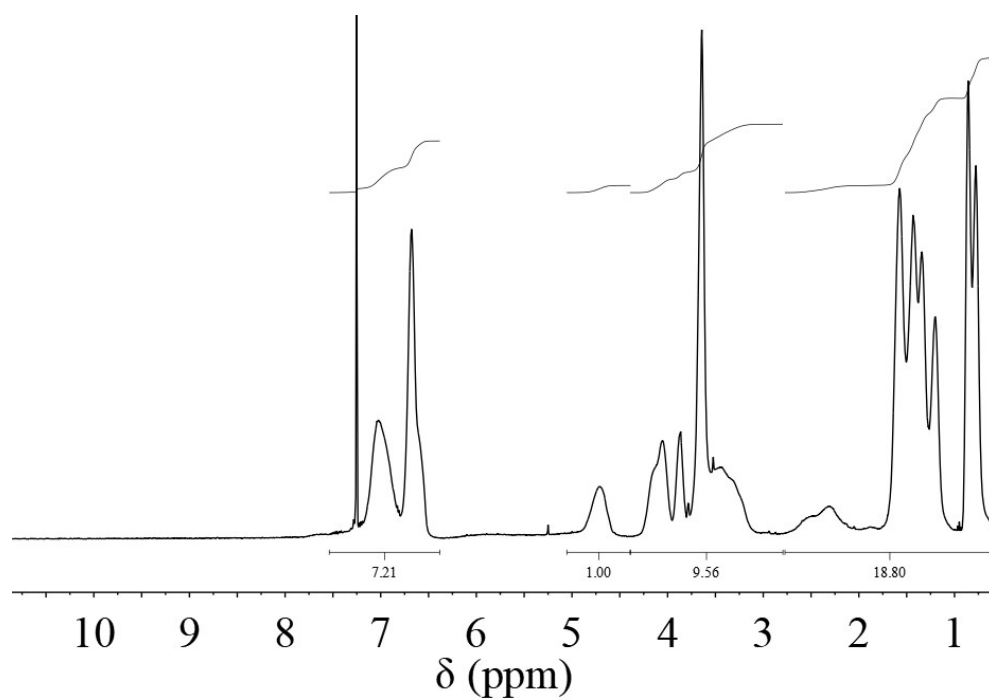

**Fig. S10** <sup>1</sup>H NMR spectrum of the obtained polymer after Kabachnik-Fields reaction on PMV with *p*-anisidine and dibutyl phosphite (PMV-6, Table 1) in CDCl<sub>3</sub> at 55 °C.



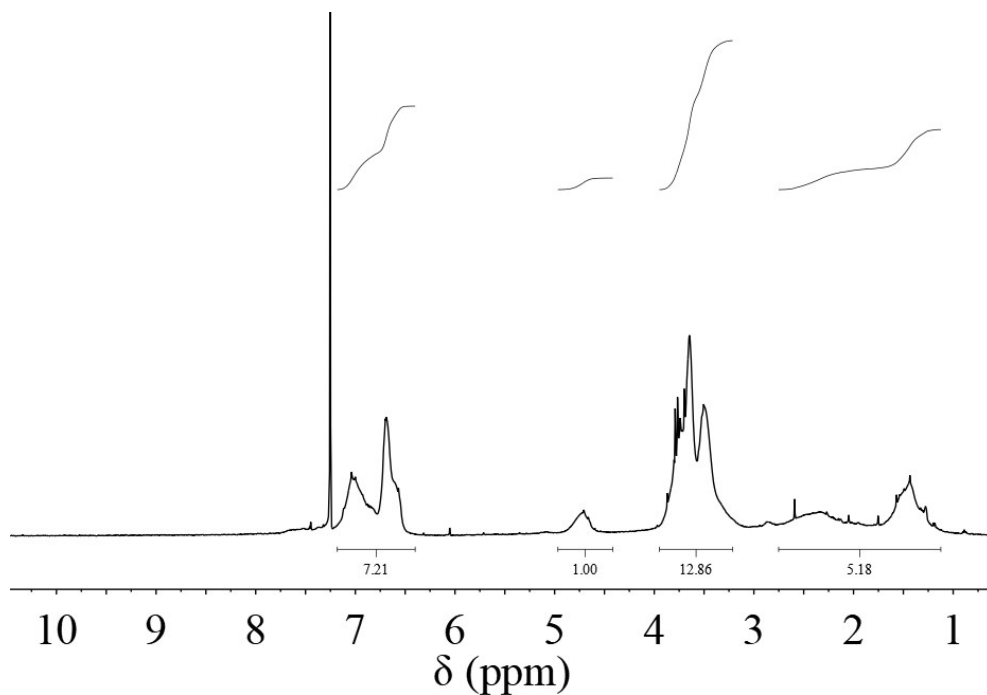

**Fig. S11**  $^1\text{H}$  NMR spectrum of the obtained polymer after Kabachnik-Fields reaction on PMV with *p*-anisidine and dimethyl phosphite (PMV-7, Table 1) in  $\text{CDCl}_3$  at 55  $^\circ\text{C}$ .

**( $^1\text{H}$  NMR for spectra PMSs)**

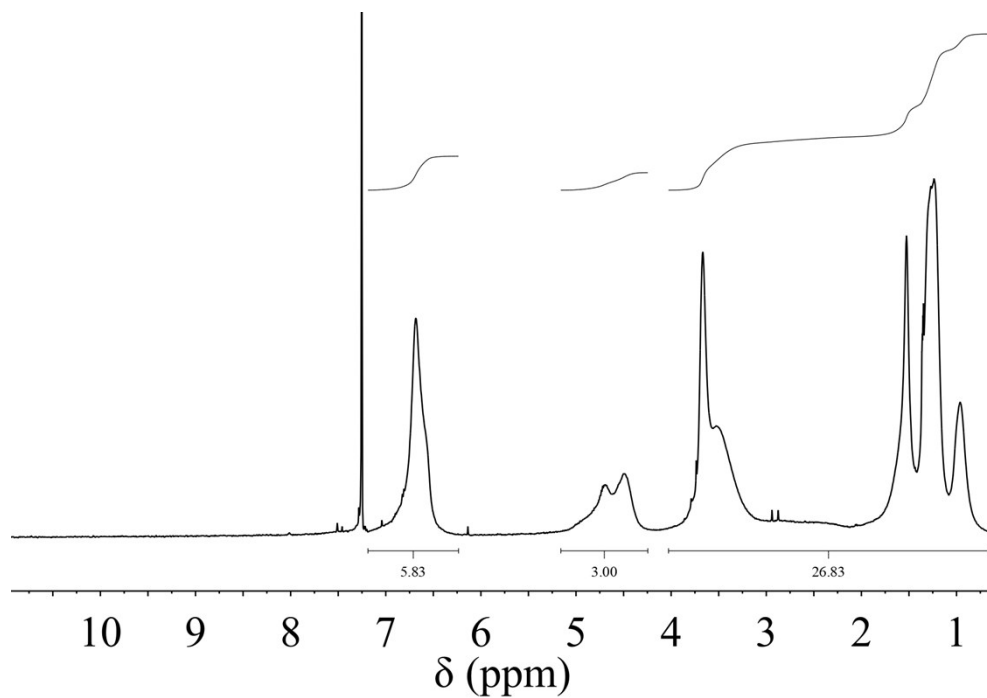

**Fig. S12**  $^1\text{H}$  NMR spectrum of the obtained polymer after Kabachnik-Fields reaction on PMS with *p*-anisidine and diisopropyl phosphite (PMS-1, Table 1) in  $\text{CDCl}_3$  at 55  $^\circ\text{C}$ .

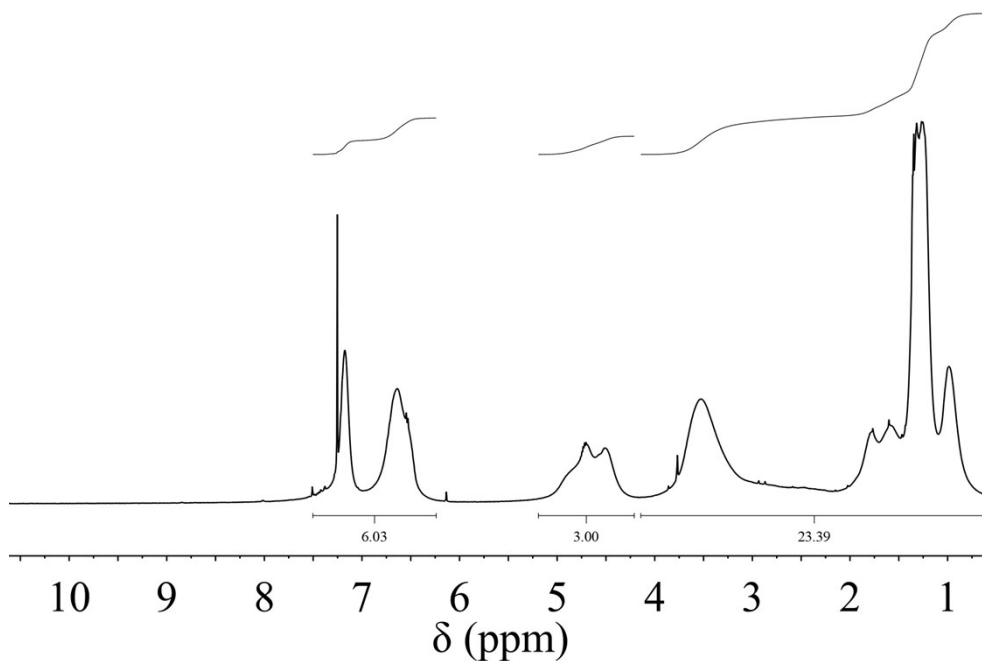

**Fig. S13** <sup>1</sup>H NMR spectrum of the obtained polymer after Kabachnik-Fields reaction on PMS with *p*-bromoaniline and diisopropyl phosphite (PMS-2, Table 1) in CDCl<sub>3</sub> at 55 °C.

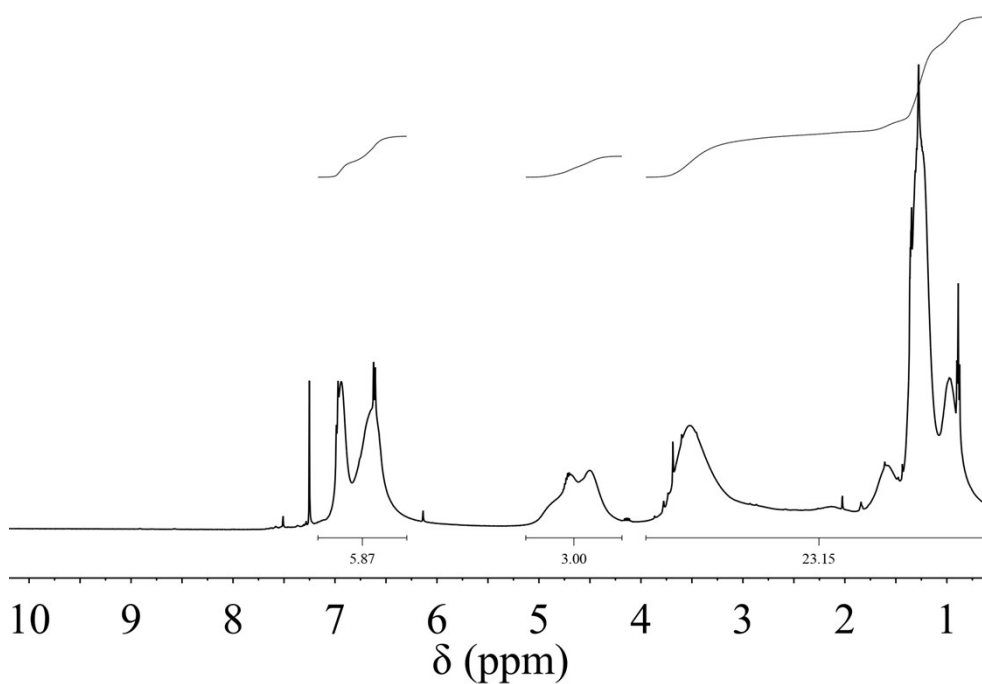

**Fig. S14** <sup>1</sup>H NMR spectrum of the obtained polymer after Kabachnik-Fields reaction on PMS with 4-(trifluoromethoxy)aniline and diisopropyl phosphite (PMS-3, Table 1) in CDCl<sub>3</sub> at 55 °C.

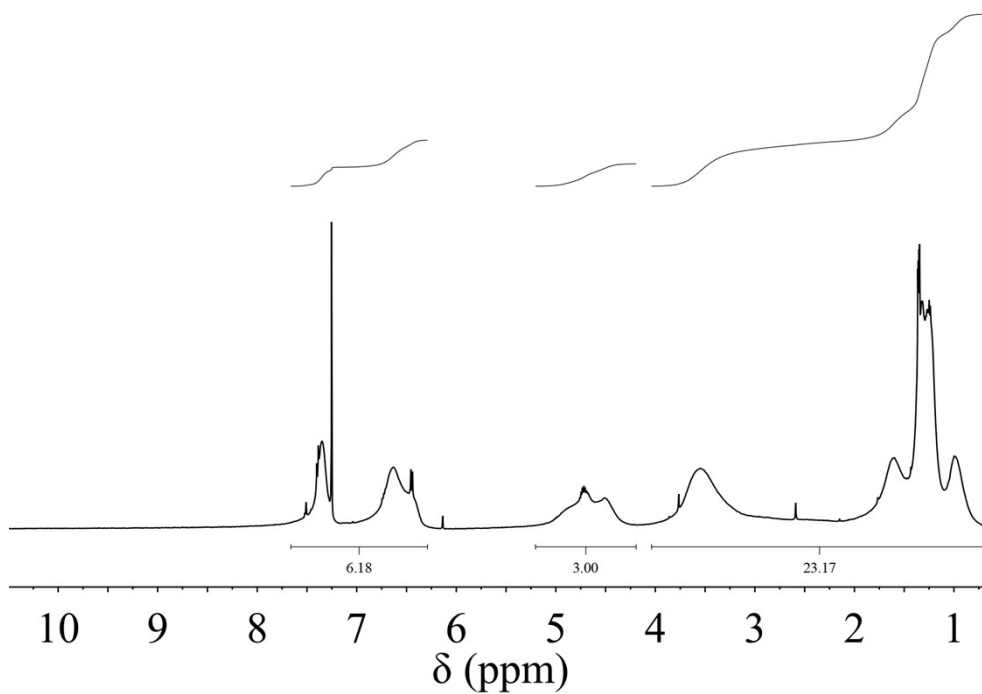

**Fig. S15** <sup>1</sup>H NMR spectrum of the obtained polymer after Kabachnik-Fields reaction on PMS with 4-iodo aniline and diisopropyl phosphite (PMS-4, Table 1) in CDCl<sub>3</sub> at 55 °C.

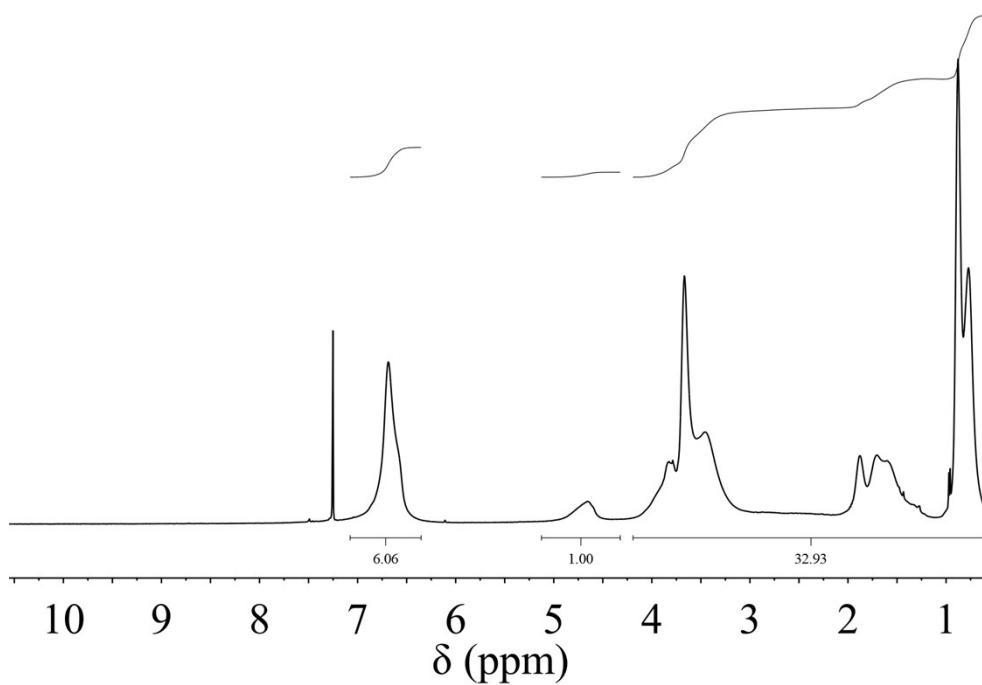

**Fig. S16** <sup>1</sup>H NMR spectrum of the obtained polymer after Kabachnik-Fields reaction on PMS with *p*-anisidine and diisobutyl phosphite (PMS-5, Table 1) in CDCl<sub>3</sub> at 55 °C.

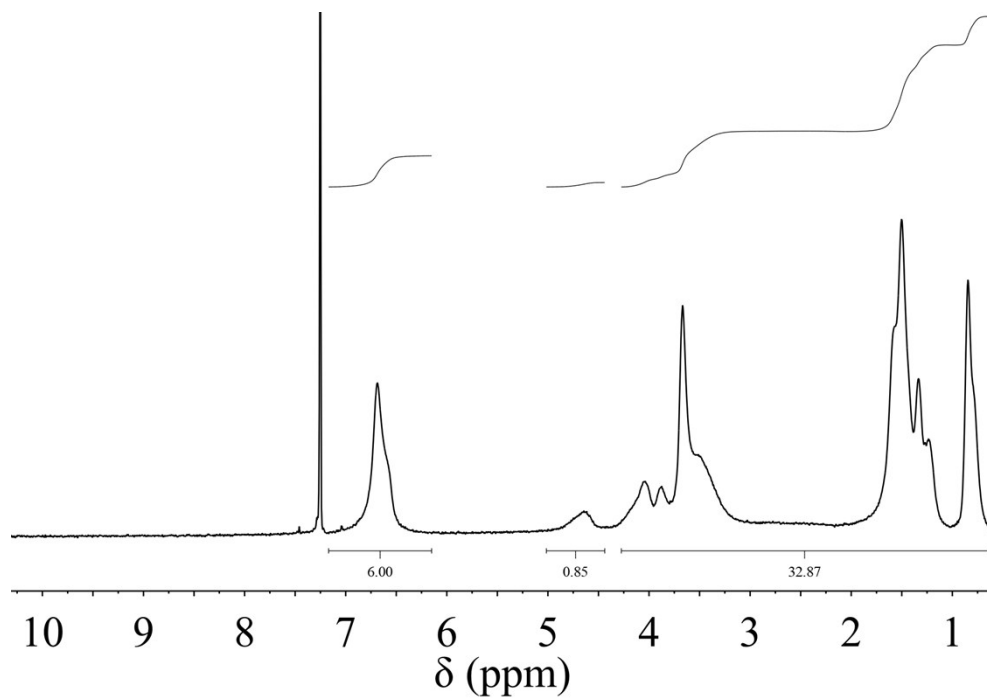

**Fig. S17**  $^1\text{H}$  NMR spectrum of the obtained polymer after Kabachnik-Fields reaction on PMS with *p*-anisidine and dibutyl phosphite (PMS-6, Table 1) in  $\text{CDCl}_3$  at 55  $^\circ\text{C}$ .

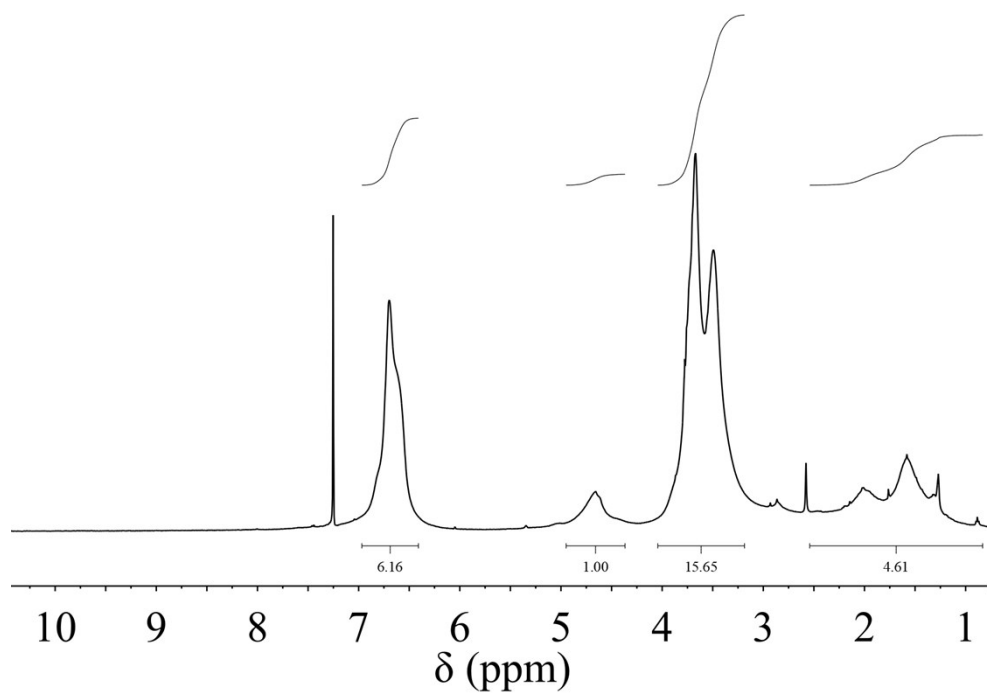

**Fig. S18**  $^1\text{H}$  NMR spectrum of the obtained polymer after Kabachnik-Fields reaction on PMS with *p*-anisidine and dimethyl phosphite (PMS-7, Table 1) in  $\text{CDCl}_3$  at 55  $^\circ\text{C}$ .

**(<sup>31</sup>P NMR spectra for PMV and PMS derived samples)**

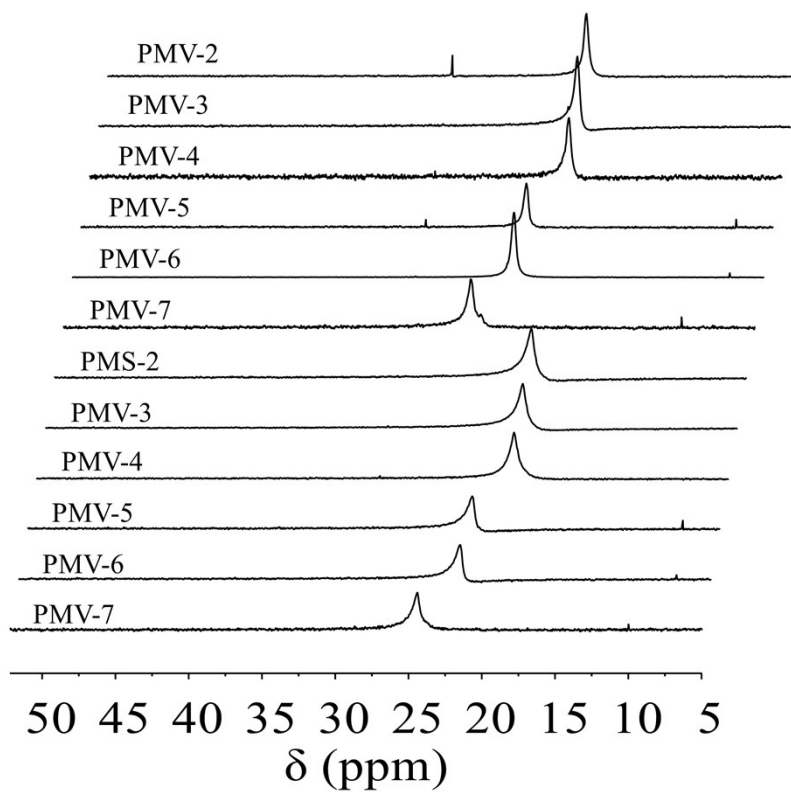

**Fig. S19** <sup>31</sup>P NMR spectra of all the polymeric amino phosphonate esters synthesized via KF-PMR of PMV and PMS in CDCl<sub>3</sub>.

(SEC analysis of all the obtained polymers)

*Table S1. Molecular weights and dispersity of all the polymer samples determined based on polystyrene standards*

| sample             | $M_n$<br>( $10^3 \text{ kg} \cdot \text{mol}^{-1}$ ) | $M_w$<br>( $10^3 \text{ kg} \cdot \text{mol}^{-1}$ ) | $\bar{D}$ |
|--------------------|------------------------------------------------------|------------------------------------------------------|-----------|
| PMV <sup>a</sup>   | 14                                                   | 70                                                   | 5.0       |
| PMV-1 <sup>a</sup> | 32                                                   | 74                                                   | 2.3       |
| PMV-2 <sup>a</sup> | 18                                                   | 60                                                   | 3.3       |
| PMV-3 <sup>a</sup> | 16                                                   | 58                                                   | 3.6       |
| PMV-4 <sup>b</sup> | 38                                                   | 225                                                  | 5.9       |
| PMV-5 <sup>b</sup> | 31                                                   | 197                                                  | 6.3       |
| PMV-6 <sup>b</sup> | 30                                                   | 248                                                  | 8.1       |
| PMV-7 <sup>b</sup> | 23                                                   | 119                                                  | 5.1       |
| PMS <sup>a</sup>   | 13                                                   | 35                                                   | 2.7       |
| PMS-1 <sup>a</sup> | 18                                                   | 47                                                   | 2.6       |
| PMS-2 <sup>a</sup> | 18                                                   | 51                                                   | 2.8       |
| PMS-3 <sup>a</sup> | 29                                                   | 81                                                   | 2.8       |
| PMS-4 <sup>a</sup> | 24                                                   | 65                                                   | 2.7       |
| PMS-5 <sup>b</sup> | 28                                                   | 97                                                   | 3.5       |
| PMS-6 <sup>b</sup> | 28                                                   | 99                                                   | 3.6       |
| PMS-7 <sup>b</sup> | 13                                                   | 57                                                   | 4.3       |

<sup>a</sup> Measured in  $\text{CHCl}_3$  at r.t. at a flow rate of  $1.0 \text{ mL} \cdot \text{min}^{-1}$  by JASCO GPC system comprised of PU-2080 Plus, UV-2077 plus, DG-980-50, and RI-2031 Plus (JASCO Co., Tokyo, Japan) equipped with TSKgel MultiporeH<sub>XL</sub>-M (Tosoh Co., Tokyo, Japan). <sup>b</sup> Measured in DMF containing  $0.01 \text{ mol} \cdot \text{L}^{-1}$  LiBr at  $40 \text{ }^\circ\text{C}$  at a flow rate of  $1.0 \text{ mL} \cdot \text{min}^{-1}$  by Prominence UFLC system (Shimadzu Co., Kyoto, Japan) equipped with TSK gel  $\alpha$ -M (Tosoh Co., Tokyo, Japan).

**(DSC curves for PMV and PMS derived samples)**

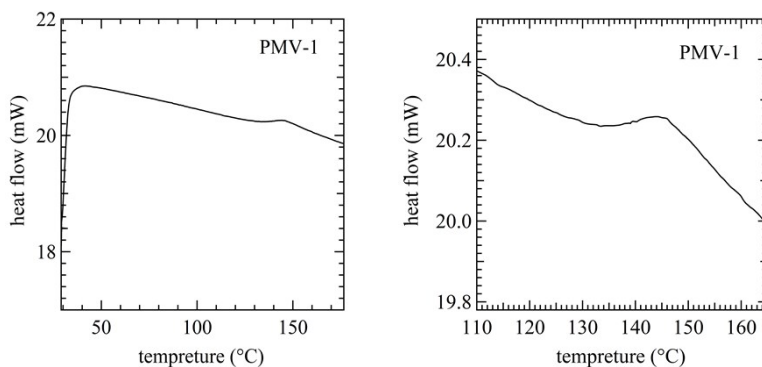

**Fig. S20** DSC curves (left; whole region, right; magnified region) of the obtained polymer after Kabachnik-Fields reaction on PMV with *p*-anisidine and diisopropyl phosphite (PMV-1, Table 1).

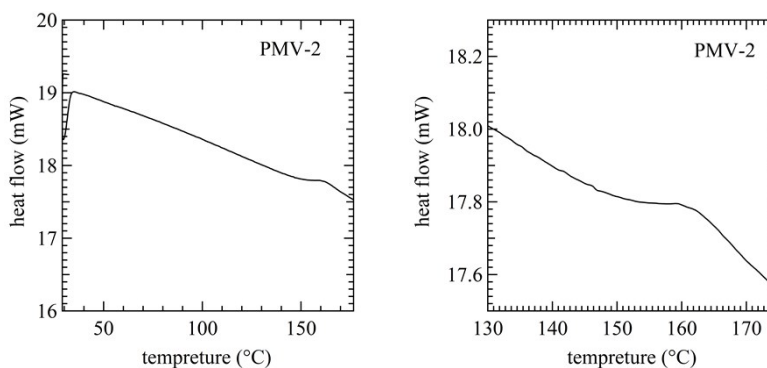

**Fig. S21** DSC curves (left; whole region, right; magnified region) of the obtained polymer after Kabachnik-Fields reaction on PMV with *p*-bromoaniline and diisopropyl phosphite (PMV-2, Table 1).

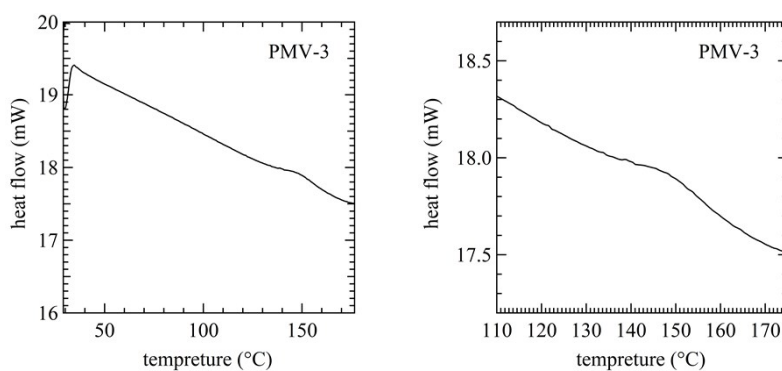

**Fig. S22** DSC curves (left; whole region, right; magnified region) of the obtained polymer after Kabachnik-Fields reaction on PMV with 4-(trifluoromethoxy)aniline and diisopropyl phosphite (PMV-3, Table 1).

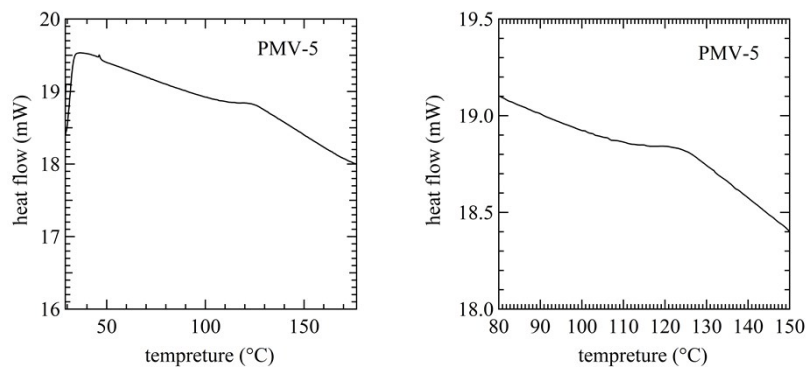

**Fig. S23** DSC curves (left; whole region, right; magnified region) of the obtained polymer after Kabachnik-Fields reaction on PMV with *p*-anisidine and diisobutyl phosphite (PMV-5, Table 1).

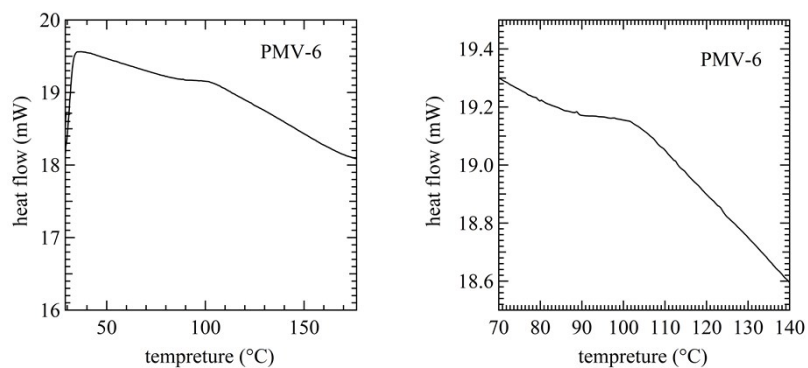

**Fig. S24** DSC curves (left; whole region, right; magnified region) of the obtained polymer after Kabachnik-Fields reaction on PMV with *p*-anisidine and dibutyl phosphite (PMV-6, Table 1).



(The magnified DTA profiles for PMV and PMS derived samples)

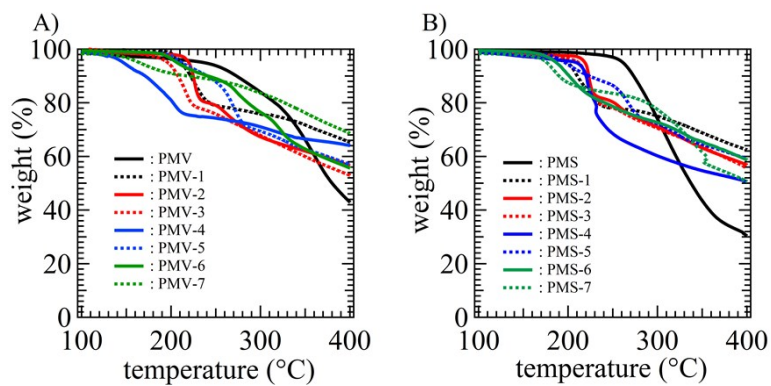

**Fig. S25** TG/DTA curves in the range from 100 to 400 °C for the obtained polymers before and after the KF-PMR of PMV (A) and PMS (B) with aromatic amines and phosphites (the run numbers correspond to those in Table 1) measured at the heating rate of 10 °C·min<sup>-1</sup> in air.
